# Supplementary material for: High-throughput computational screening of 137953 metal–organic frameworks for membrane separation of a CO2/N2/CH4 mixture
Source: Royal Society of Chemistry journal article supplement (doi:10.1039/c6ta06262h), 2016-01-01
Supplement: c6ta06262h1.pdf [file c6ta06262h1.pdf]

# Electronic supplementary information

## High-throughput computational screening of 137953 metal-organic frameworks for membrane separation of CO<sub>2</sub>/N<sub>2</sub>/CH<sub>4</sub> mixture

Zhiwei Qiao<sup>1</sup>, Chunwang Peng<sup>2</sup>, Jian Zhou<sup>2</sup> and Jianwen Jiang<sup>1\*</sup>

<sup>1</sup>*Department of Chemical and Biomolecular Engineering, National University of Singapore, 117576, Singapore*

<sup>2</sup>*School of Chemistry and Chemical Engineering, Guangdong Provincial Key Lab for Green Chemical Product Technology, South China University of Technology, Guangzhou 510640, China*

### Table of Contents

|                                                                                                                     |     |
|---------------------------------------------------------------------------------------------------------------------|-----|
| 1. Molecular models                                                                                                 | S2  |
| 2. Pore limiting diameters                                                                                          | S3  |
| 3. Diffusion of CO <sub>2</sub> , N <sub>2</sub> and CH <sub>4</sub> at infinite dilution in a MOF with PLD = 3.2 Å | S4  |
| 4. Percentage of pore size distribution between $d_1$ and $d_2$                                                     | S5  |
| 5. Diffusivity and diffusion selectivity versus density, porosity and VSA                                           | S6  |
| 6. Permeation and permselectivity versus density, porosity and VSA                                                  | S8  |
| 7. 24 Prescreened MOFs                                                                                              | S10 |
| 8. CO <sub>2</sub> /N <sub>2</sub> /CH <sub>4</sub> mixture in a MOF with PLD = 3.2 Å                               | S14 |

## 1. Molecular models

**Table S1** Lennard Jones parameters of MOFs.

| Atoms              | C     | O     | H     | N     | F     | Cl     | Br    | Zn    | Cu    | Zr    | V    |
|--------------------|-------|-------|-------|-------|-------|--------|-------|-------|-------|-------|------|
| $\sigma$ (Å)       | 3.43  | 3.12  | 2.57  | 3.26  | 2.997 | 3.517  | 3.73  | 2.46  | 3.114 | 2.783 | 2.80 |
| $\epsilon/k_B$ (K) | 52.83 | 30.19 | 22.14 | 34.72 | 25.16 | 114.23 | 126.3 | 62.40 | 2.516 | 34.72 | 8.05 |

From A. K. Rappe, C. J. Casewit, K. S. Colwell, W. A. Goddard, W. M. Skiff, UFF, a Full Periodic Table Force Field for Molecular Mechanics and Molecular Dynamics Simulations. *J. Am. Chem. Soc.* 1992, **114**, 10024-10035.

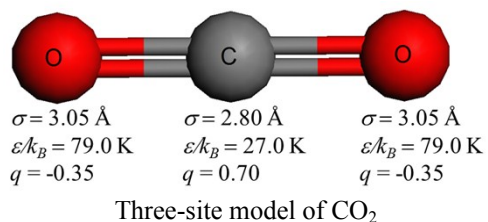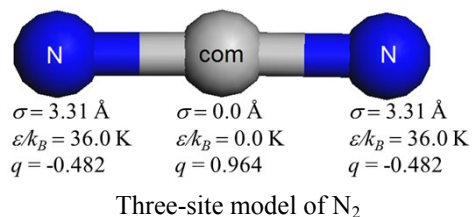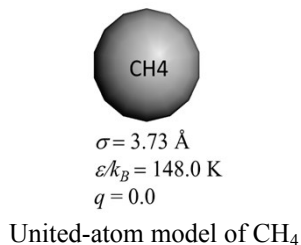

**Fig. S1** Lennard-Jones parameters and charges of CO<sub>2</sub>, N<sub>2</sub> and CH<sub>4</sub>.

From J. J. Potoff, J. I. Siepmann, Vapor-Liquid Equilibria of Mixtures Containing Alkanes, Carbon Dioxide and Nitrogen. *AIChE J.* 2001, **47**, 1676-1682.

## 2. Pore limiting diameters

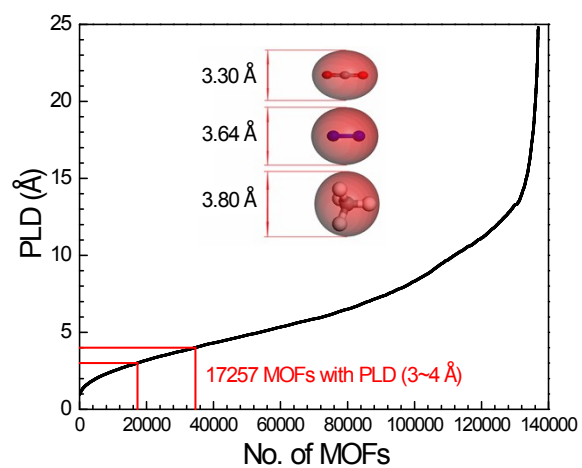

**Fig. S2** PLDs of 137953 MOFs. There are 17257 MOFs with PLD between 3 ~ 4 Å.

### 3. Diffusion of CO<sub>2</sub>, N<sub>2</sub> and CH<sub>4</sub> at infinite dilution in a MOF with PLD = 3.2 Å

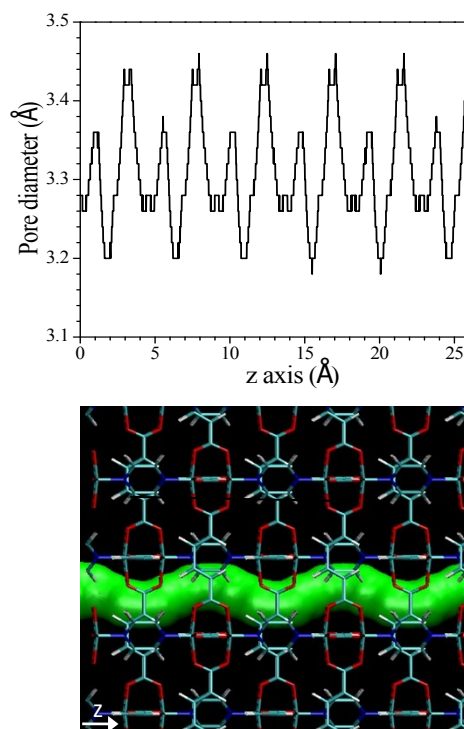

**Fig. S3** Pore diameter and morphology along z-axis in a MOF (ID: 31136) with PLD of 3.2 Å.

**MOF\_31136+CO2.mp4**, **MOF\_31136+N2.mp4** and **MOF\_31136+CH4.mp4** visualize the diffusion of CO<sub>2</sub>, N<sub>2</sub> and CH<sub>4</sub> in a MOF (ID: 31136) at infinite dilution. In each video, the number of gas molecules is 30; however, there is no gas-gas intermolecular interaction, thus corresponding to infinite dilution.

#### 4. Percentage of pore size distribution between $d_1$ and $d_2$

As illustrated in Fig. S4, the percentage of pore size distribution (PSD) between  $d_1$  and  $d_2$  is defined as

$$\text{PSD}\%_{(d_1 \sim d_2)} = A_{12}/A_{\text{total}} \times 100\%$$

where  $A_{12}$  is the area for pore size between  $d_1$  and  $d_2$ , and  $A_{\text{total}}$  is the total area under the entire PSD curve.

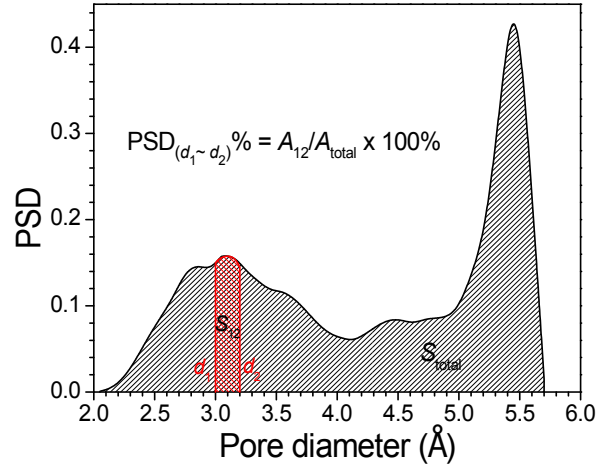

**Fig. S4** Pore size distribution between  $d_1$  and  $d_2$ .

## 5. Diffusivity and diffusion selectivity versus density, porosity and VSA

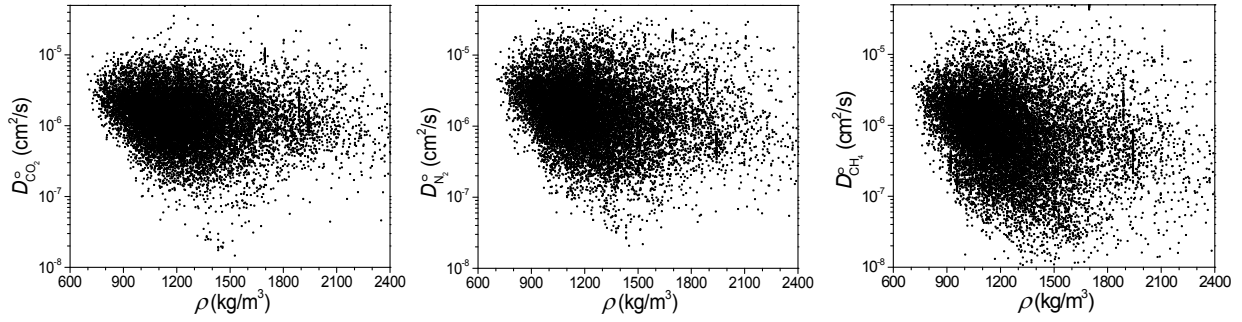

Fig. S5.1 Diffusivity versus density.

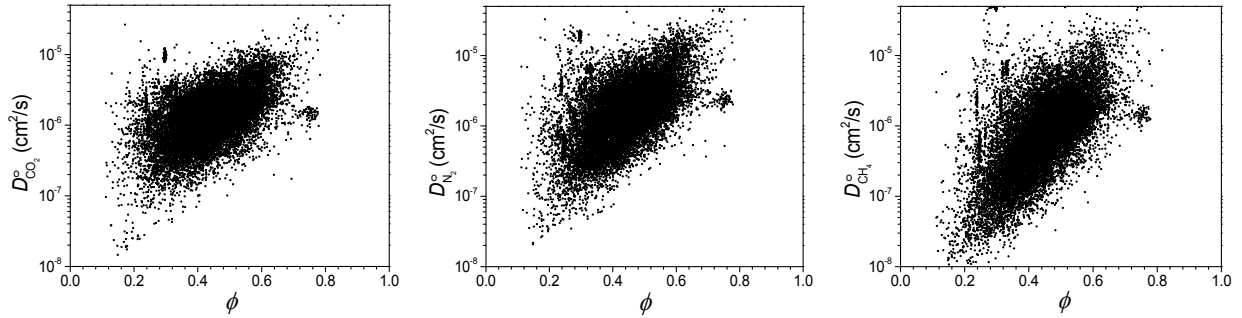

Fig. S5.2 Diffusivity versus porosity.

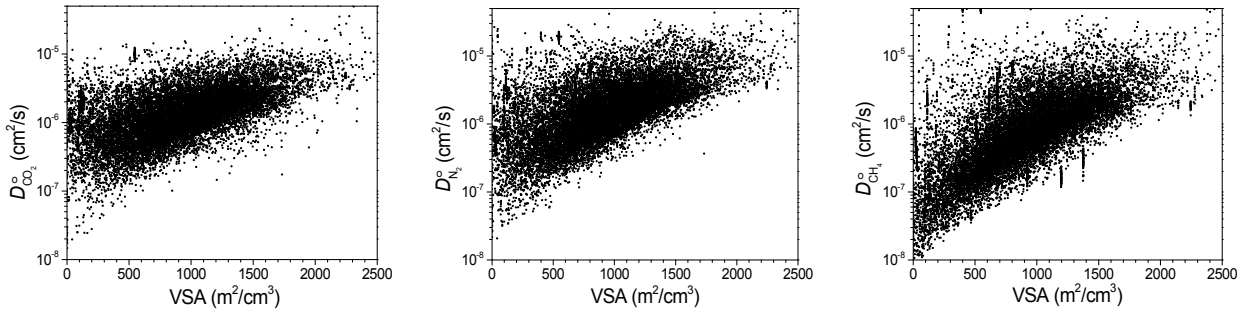

Fig. S5.3 Diffusivity versus VSA.

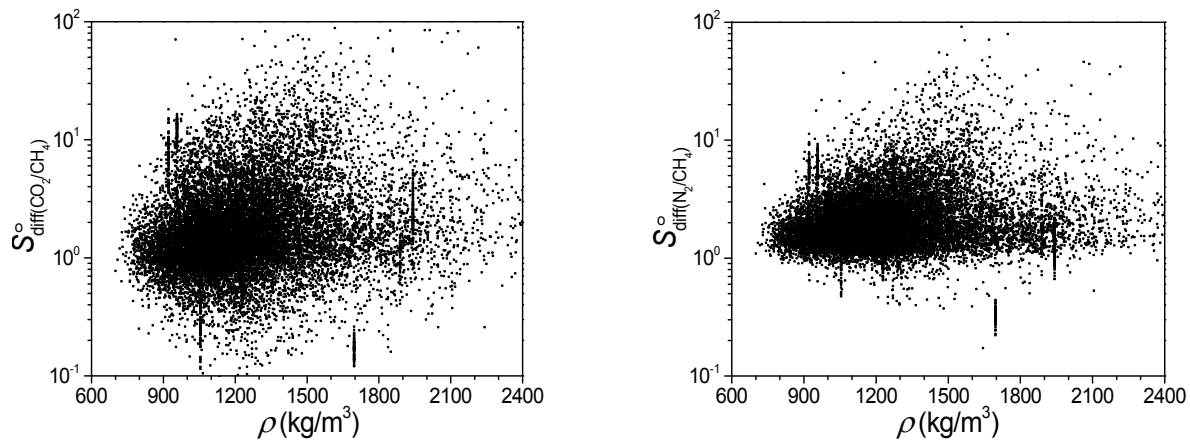

**Fig. S6.1** Diffusion selectivity versus density for CO<sub>2</sub>/CH<sub>4</sub> and N<sub>2</sub>/CH<sub>4</sub>.

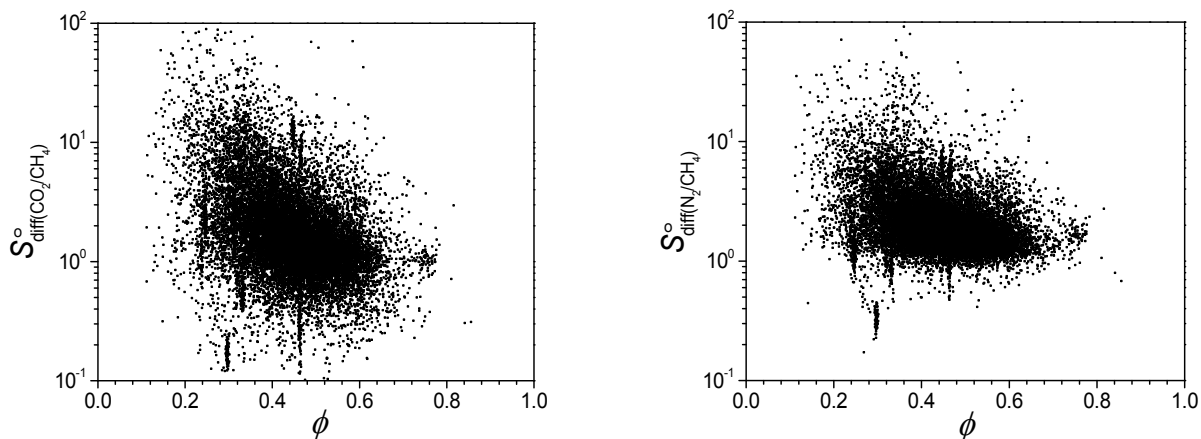

**Fig. S6.2** Diffusion selectivity versus porosity for CO<sub>2</sub>/CH<sub>4</sub> and N<sub>2</sub>/CH<sub>4</sub>.

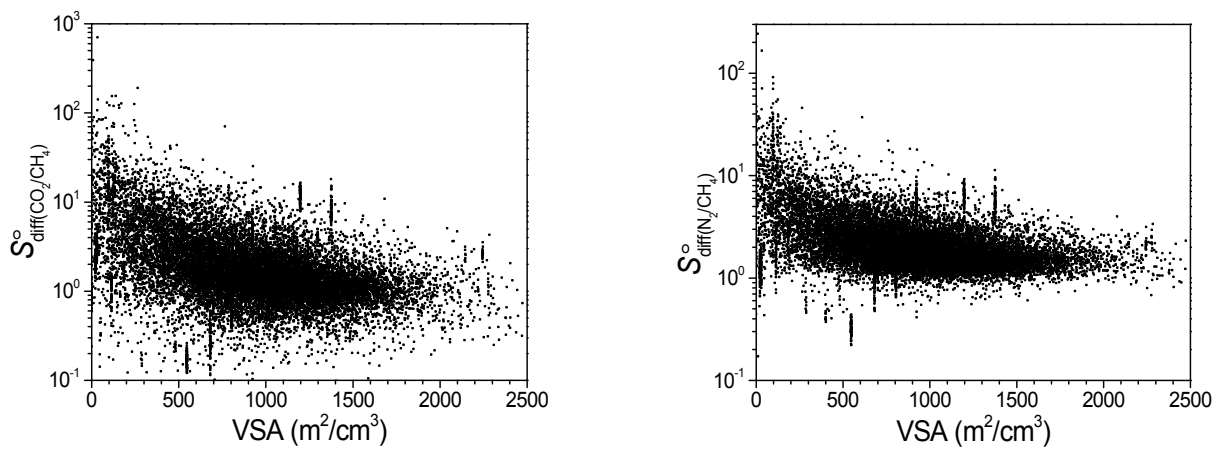

**Fig. S6.3** Diffusion selectivity versus VSA for CO<sub>2</sub>/CH<sub>4</sub> and N<sub>2</sub>/CH<sub>4</sub>.

## 6. Permeation and permselectivity versus density, porosity and VSA

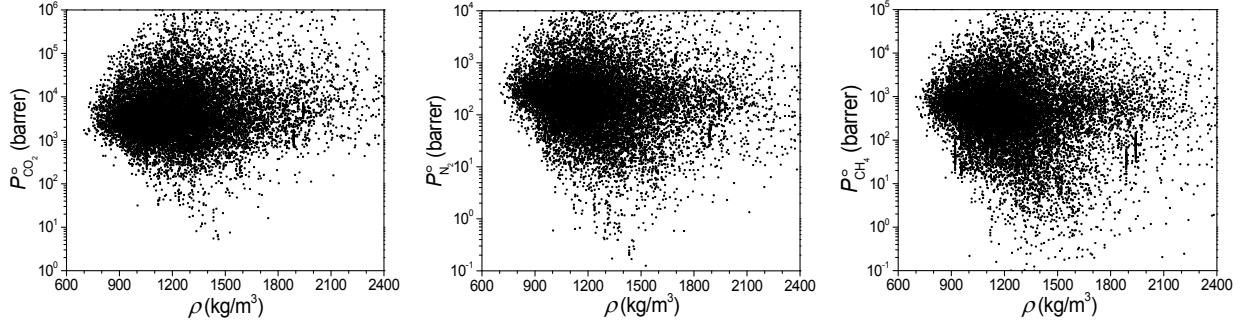

Fig. S7.1 Permeability versus density.

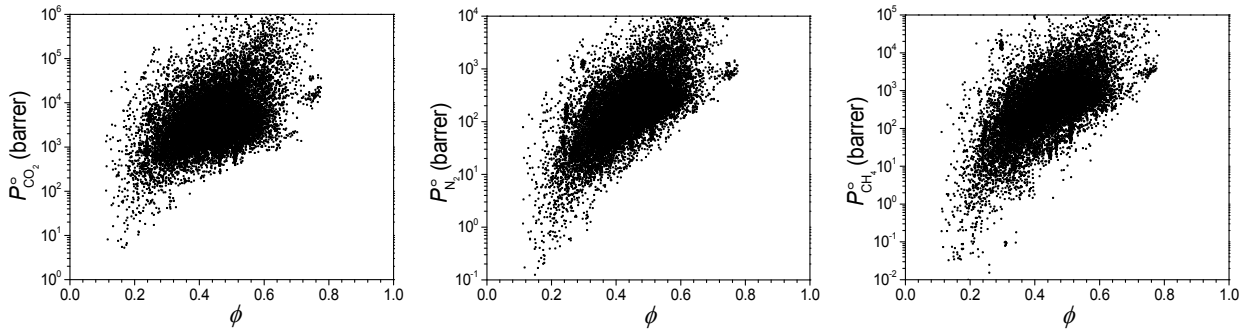

Fig. S7.2 Permeability versus porosity.

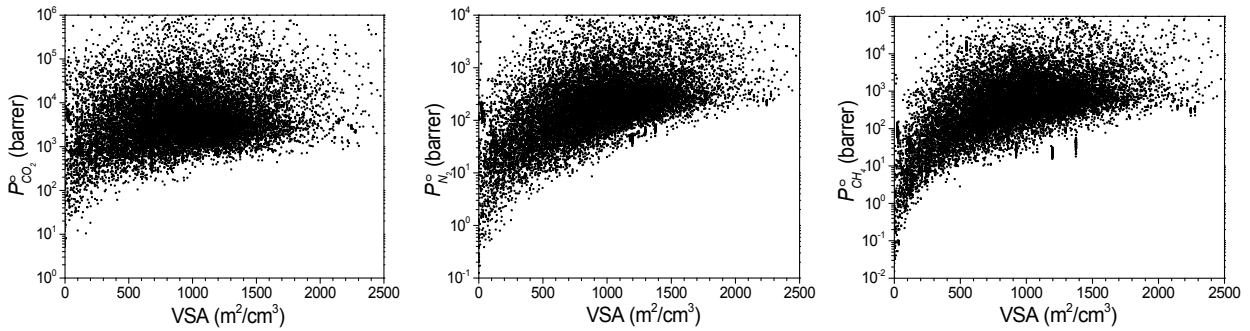

Fig. S7.3 Permeability versus VSA.



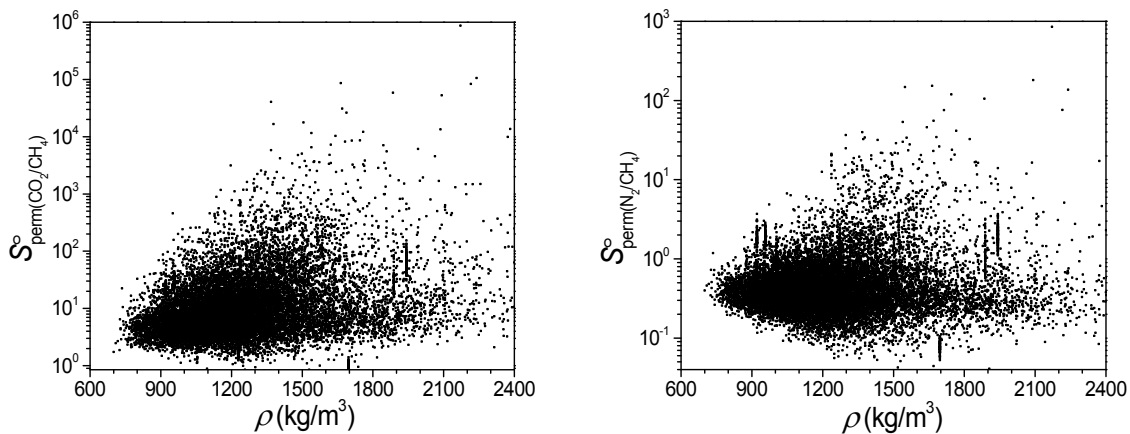

**Fig. S8.1** Permselectivity versus density for CO<sub>2</sub>/CH<sub>4</sub> and N<sub>2</sub>/CH<sub>4</sub>.

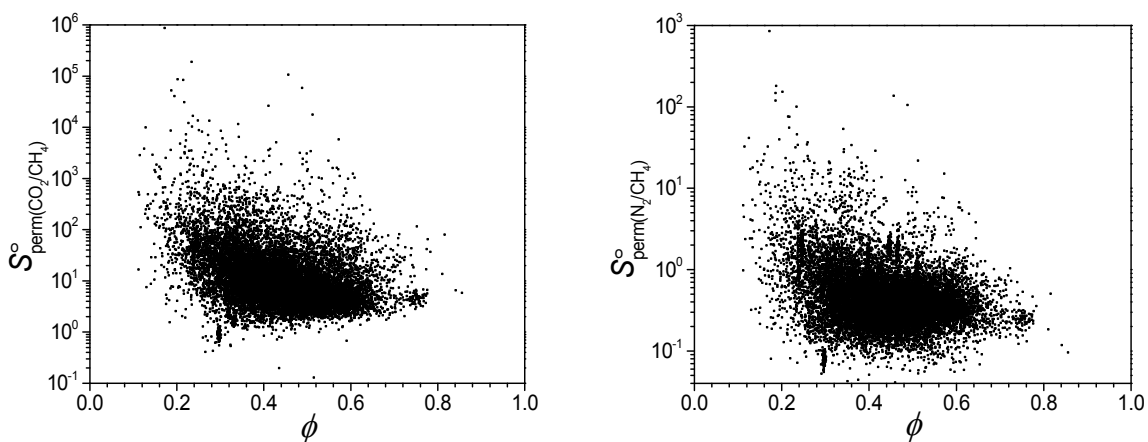

**Fig. S8.2** Permselectivity versus porosity for CO<sub>2</sub>/CH<sub>4</sub> and N<sub>2</sub>/CH<sub>4</sub>.

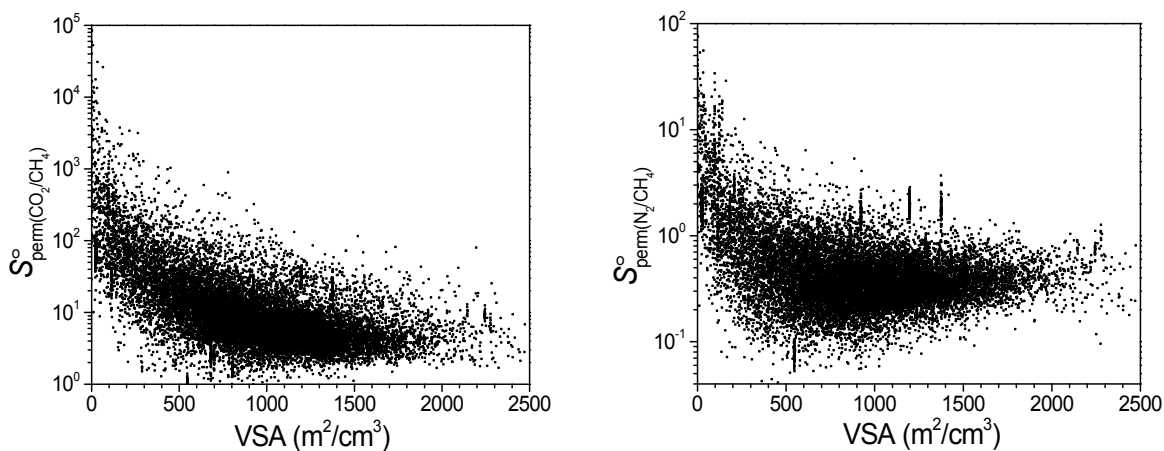

**Fig. S8.3** Permselectivity versus VSA for CO<sub>2</sub>/CH<sub>4</sub> and N<sub>2</sub>/CH<sub>4</sub>.

## 7. 24 Prescreened MOFs

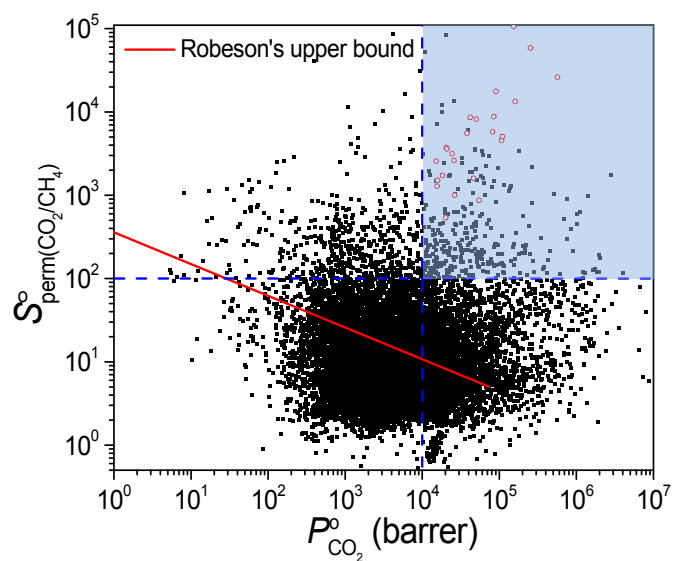

Fig. S9 Prescreened MOFs (red circles) for both CO<sub>2</sub>/CH<sub>4</sub> and N<sub>2</sub>/CH<sub>4</sub> separation.

No. 1 (ID: 5923)

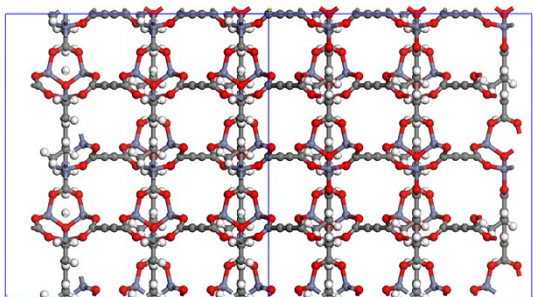

No. 2 (ID: 5925)

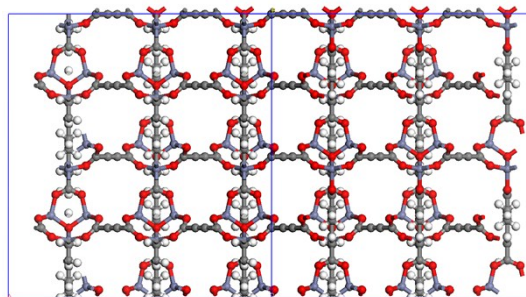

No. 3 (ID: 6001)

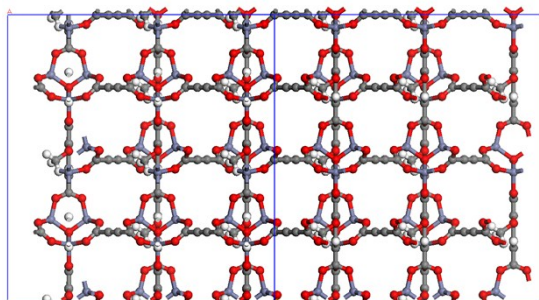

No. 4 (ID: 10480)

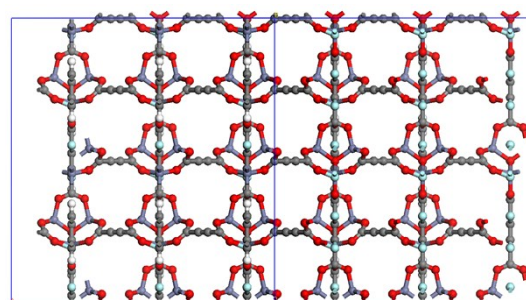

No. 5 (ID: 5065097)

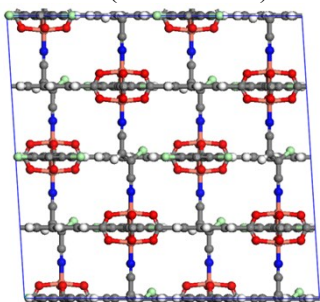

No. 6 (ID: 10487)

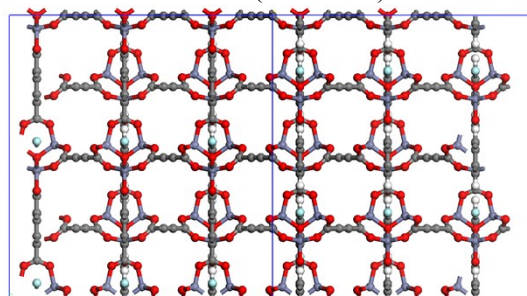

No. 7 (ID: 10493)

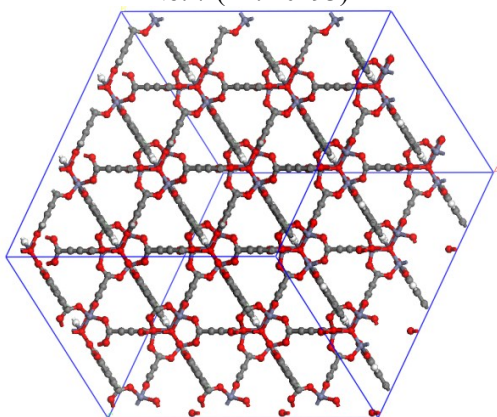

No. 8 (ID: 10520)

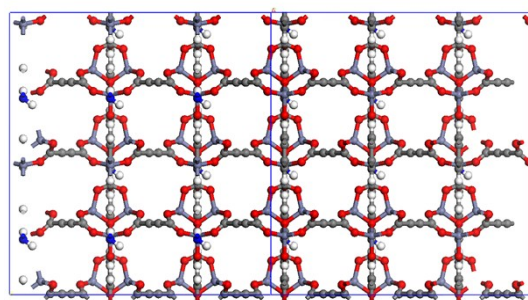

No. 9 (ID: 10533)

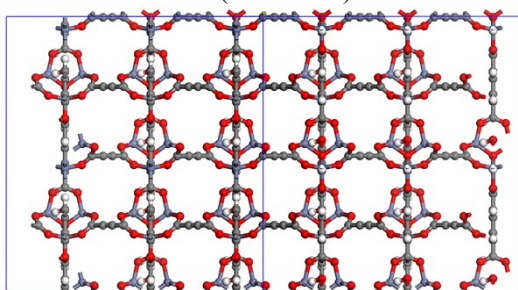

No. 10 (ID: 10549)

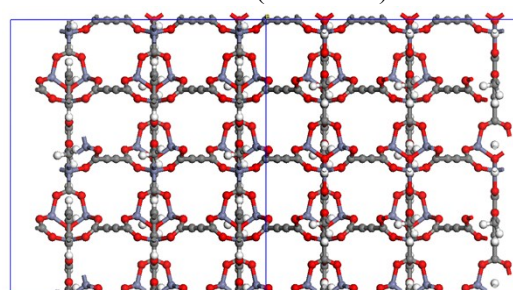

No. 11 (ID: 11678)

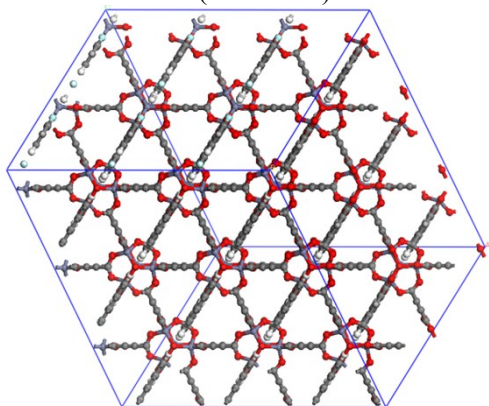

No. 12 (ID: 11680)

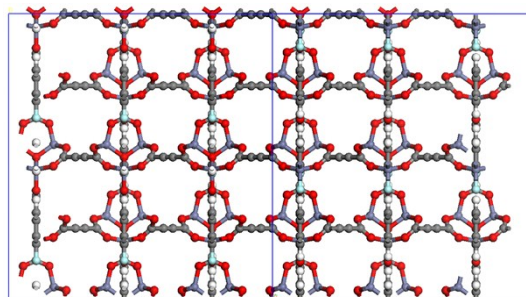

No. 13 (ID: 11683)

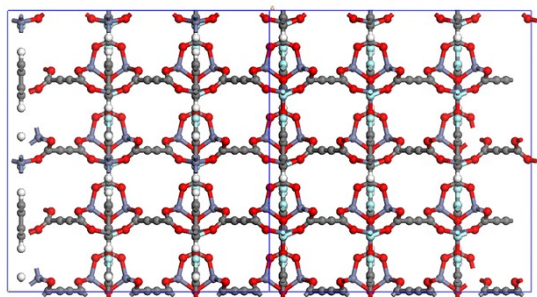

No. 14 (ID: 11694)

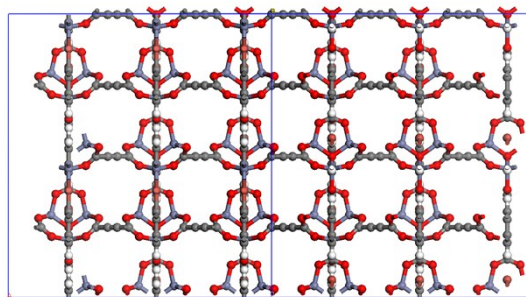

No. 15 (ID: 11699)

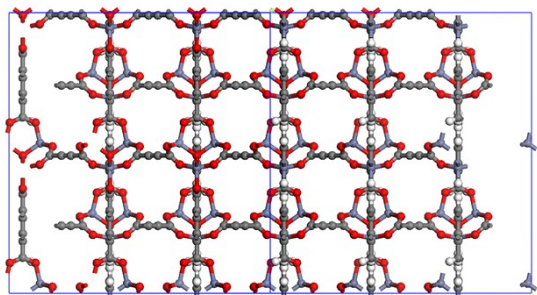

No. 16 (ID: 11726)

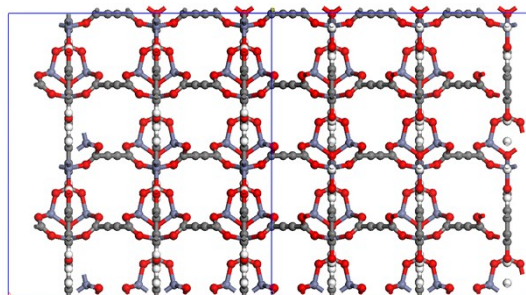

No. 17 (ID: 20684)

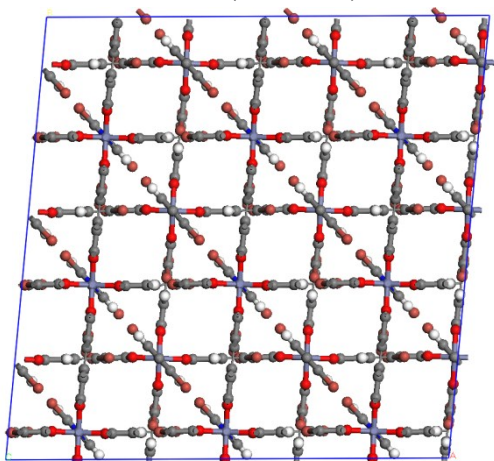

No. 18 (ID: 31136)

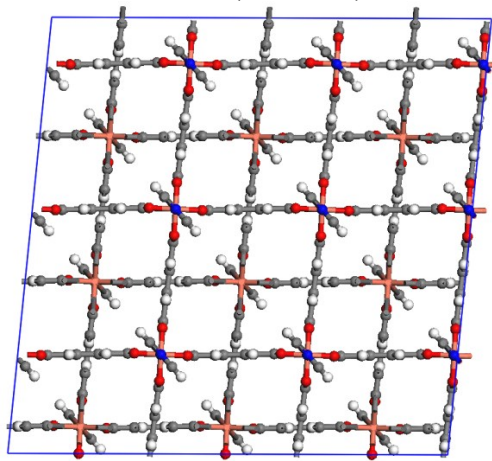

No. 19 (ID: 31797)

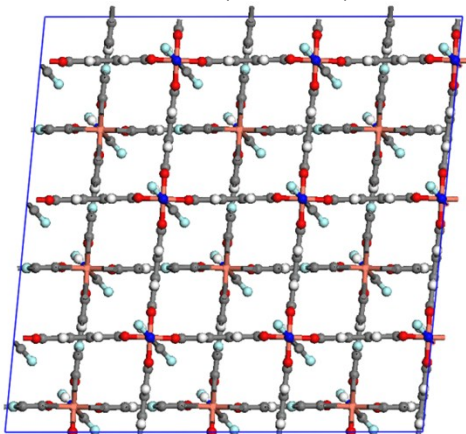

No. 20 (ID: 5039457)

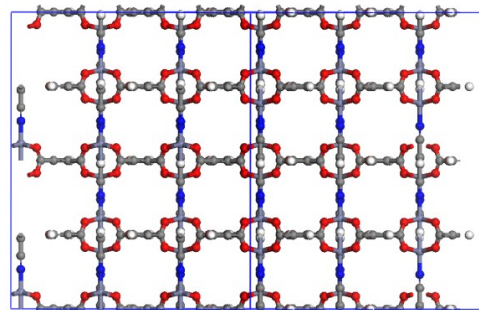

No. 21 (ID: 5039474)

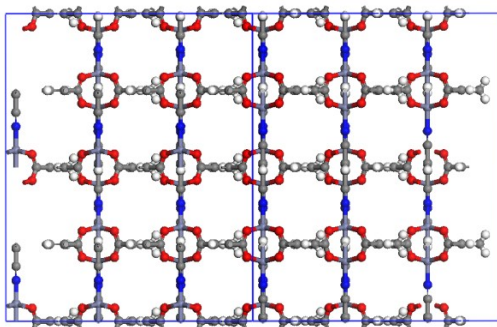

No. 22 (ID: 5060858)

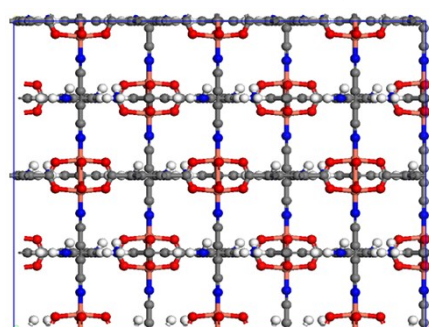

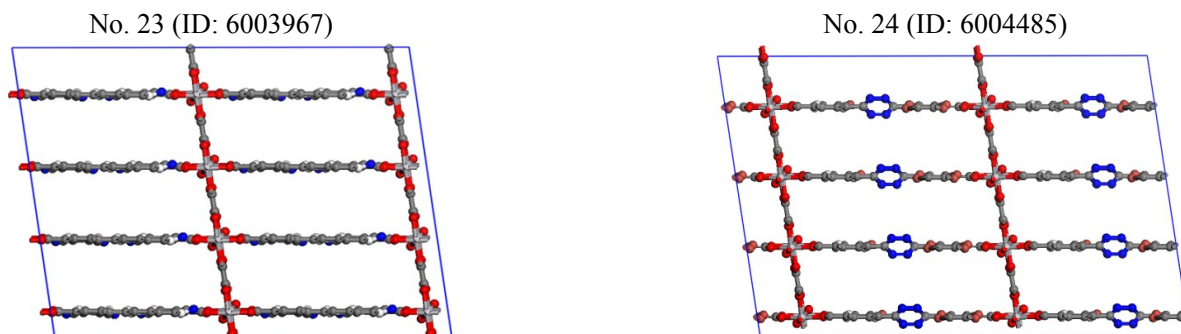

**Fig. S10** Atomistic structures of 24 prescreened MOFs.

**8. CO<sub>2</sub>/N<sub>2</sub>/CH<sub>4</sub> mixture in a MOF with PLD = 3.2 Å**

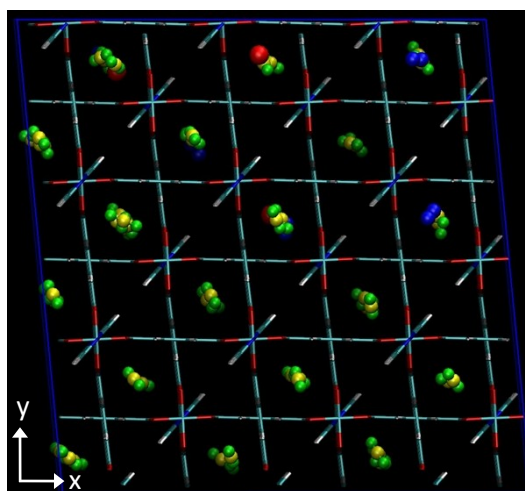

**Fig. S11** Simulation snapshot for CO<sub>2</sub>/N<sub>2</sub>/CH<sub>4</sub> mixture in a MOF (ID: 31136)  
 CO<sub>2</sub>: green-yellow-green balls, N<sub>2</sub>: blue dumbbells, CH<sub>4</sub>: red balls.
